# Supplementary material for: Experimental Study on Sleep Quality in Naturally Ventilated Rooms under Moderate Climate Conditions
Source: Hindawi journal article supplement (doi:10.1155/2023/8853643), 2023-10-27
Supplement: f1 [file 8853643.f1.docx]

## Appendix


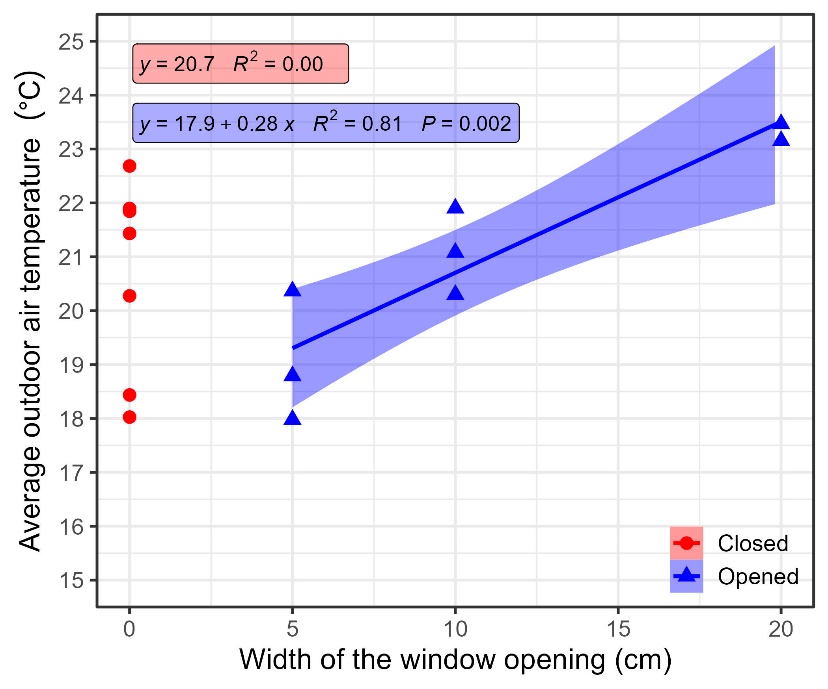


Supplemental Figure 1: Width of the window opening and outdoor air temperature.


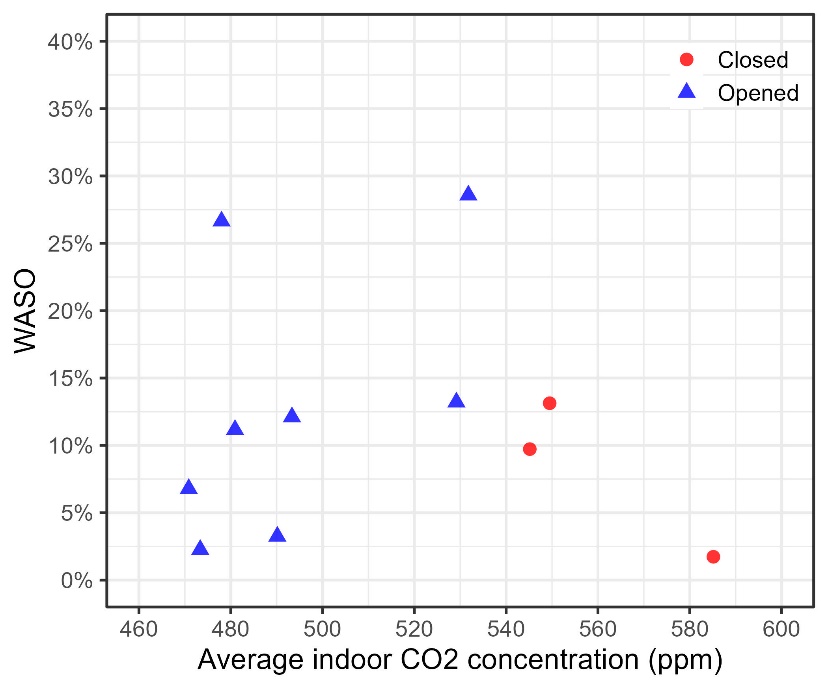


Supplemental Figure 2: Indoor CO2 concentration and WASO (%).


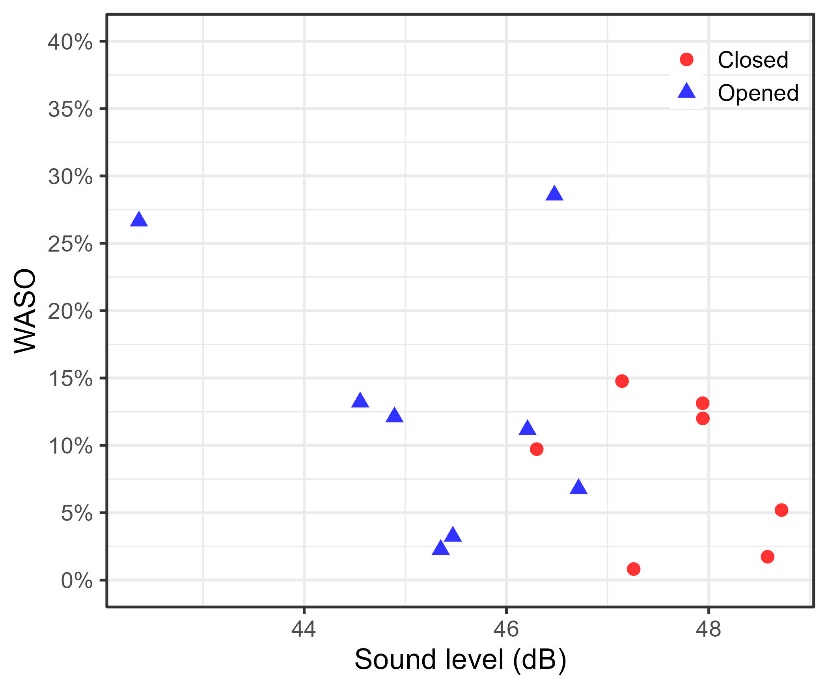


Supplemental Figure 3: Sound level and WASO (%).
